# Supplementary material
Source: MDPI journal article supplement (https://www.mdpi.com/2073-4441/13/16/2265)
Supplement: s1 [file s1]

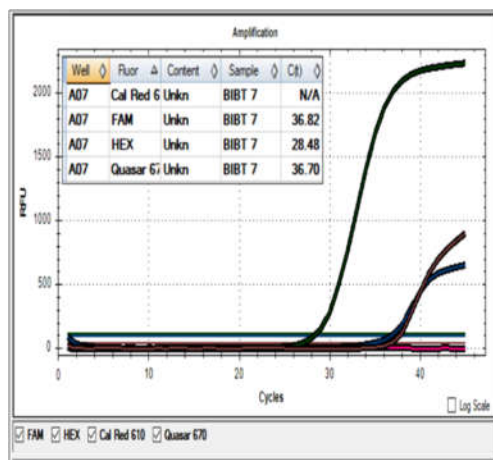

(a)

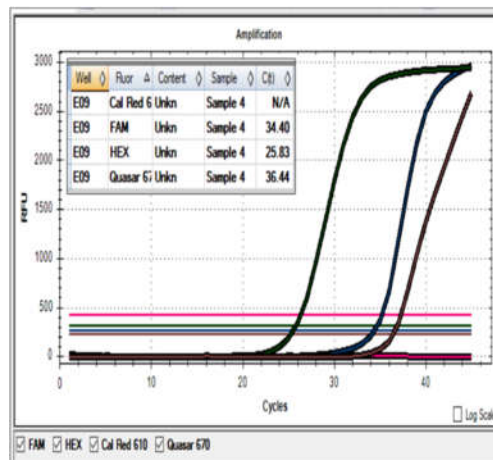

(b)

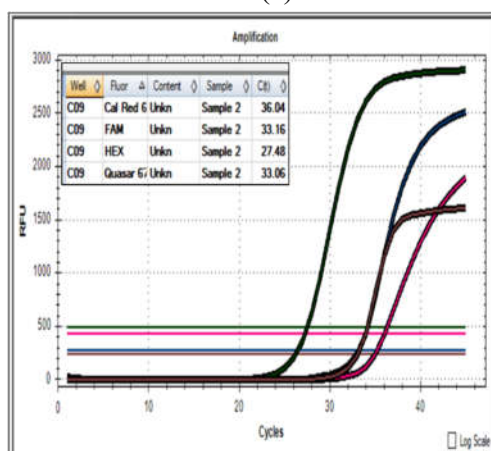

(c)

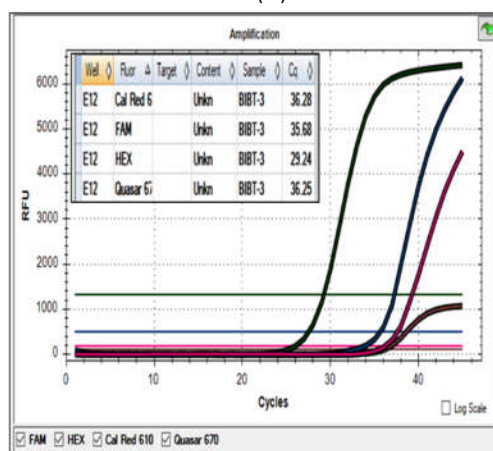

(d)

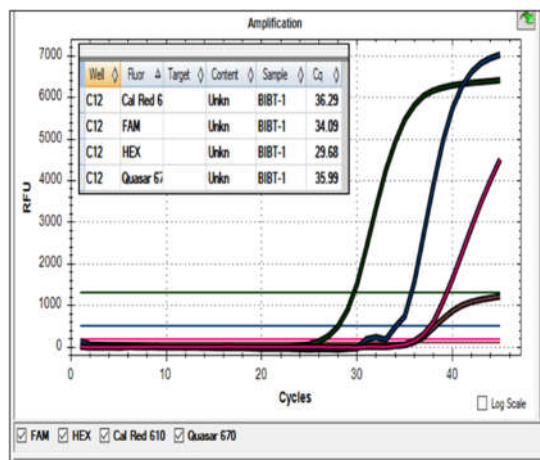

(e)

**Figure S1.** Graphs showing trends in the three genes from the months of May to August for (a) May 20 (b) June 12 (c) July 25 (d) August 4 (e) August 11 (2020)

Note: Fluorophores as defined by the kit; FAM for E gene, HEX for Internal control (IC), Cal Red 610 for RdRp gene, Quasar 670 for N gene
